# Supplementary material
Source: MDPI journal article supplement (https://www.mdpi.com/2071-1050/10/10/3822)
Supplement: s1 [file s1]

Archive with 2 entries (1 files):
- sustainability-370179-SI/
- sustainability-370179-SI/Project Samples.pdf
